# Supplementary material for: An extended dynamic model of Lactococcus lactis metabolism for mannitol and 2,3-butanediol production
Source: Royal Society of Chemistry journal article supplement (doi:10.1039/c3mb70265k), 2014-01-13
Supplement: c3mb70265k.pdf [file c3mb70265k.pdf]

**Table 1.** ODEs used in the model based on mass balances.

| ODE's                                                                                   |
|-----------------------------------------------------------------------------------------|
| $\frac{d}{dt} glc\_Ext = -v_{PTS\_Glc}$                                                 |
| $\frac{d}{dt} g6p = +v_{PTS\_Glc} - v_{PGI}$                                            |
| $\frac{d}{dt} f6p = -v_{MPD} + v_{PGI} - v_{PFK} + v_{FBPase}$                          |
| $\frac{d}{dt} fbp = +v_{PFK} - v_{FBA} - v_{FBPase}$                                    |
| $\frac{d}{dt} g3p = +2v_{FBA} - v_{GAPDH}$                                              |
| $\frac{d}{dt} bpg = +v_{GAPDH} - v_{ENO}$                                               |
| $\frac{d}{dt} pep = -v_{PTS\_Glc} + v_{ENO} - v_{PYK}$                                  |
| $\frac{d}{dt} pyr = +v_{PTS\_Glc} - v_{PFL} - v_{PDC} + 2v_{PYK} - v_{LDH}$             |
| $\frac{d}{dt} acetCoA = +v_{PFL} - v_{AE} - v_{ACK}$                                    |
| $\frac{d}{dt} acetoin = +v_{PDC} - v_{BDH} - v_{Ace. Trsp.}$                            |
| $\frac{d}{dt} acetoin\_Ext = +v_{Ace. Trsp.}$                                           |
| $\frac{d}{dt} 2,3butanediol = +v_{BD}$                                                  |
| $\frac{d}{dt} m1p = +v_{MPD} - v_{MP} + v_{PTS\_Mtl}$                                   |
| $\frac{d}{dt} mannitol = +v_{MP} - v_{Mtl. Trsp.}$                                      |
| $\frac{d}{dt} mannitol\_Ext = -v_{PTS\_Mtl} + v_{Mtl. Trsp.}$                           |
| $\frac{d}{dt} lactate = +v_{LDH}$                                                       |
| $\frac{d}{dt} ethanol = +v_{AE}$                                                        |
| $\frac{d}{dt} acetate = +v_{ACK}$                                                       |
| $\frac{d}{dt} pi = +v_{ATPase} + 2v_{pi Trsp.} - v_{GAPDH} + v_{FBPase}$                |
| $\frac{d}{dt} pi\_Ext = -v_{pi Trsp.}$                                                  |
| $\frac{d}{dt} atp = -v_{ATPase} + v_{ACK} - v_{Pi Trsp.} - v_{PFK} + v_{ENO} + v_{PYK}$ |
| $\frac{d}{dt} nad = +2v_{AE} + v_{BDH} + v_{MPD} - v_{GAPDH} + v_{LDH}$                 |
| $\frac{d}{dt} CoA = +v_{ACK} - v_{PFL} + v_{AE}$                                        |
| $\frac{d}{dt} formate = +v_{PFL}$                                                       |

**Table 2.** Initial and optimized kinetic model parameters.

| Enzyme   | Index | Parameter            | Initial value  | Source | Estimated value |
|----------|-------|----------------------|----------------|--------|-----------------|
| PTS_Glc  | 1     | $V_{max}^{PTS\_Glc}$ | 1              | [-]    | 3.71 mmol/s     |
|          | 2     | $K_a^{pi}$           | 0.5            | [-]    | 0.071 mM        |
|          | 3     | $K_i^{fbp}$          | 0.5            | [-]    | 1.17 mM         |
|          | 4     | $K_m^{g6p}$          | 0.1            | [1]    | 0.28 mM         |
|          | 5     | $K_m^{glcExt}$       | 0.015          | [1]    | 0.049 mM        |
|          | 6     | $K_m^{pep}$          | 0.15           | [1]    | 0.31 mM         |
|          | 7     | $K_m^{pyr}$          | 0.1            | [1]    | 1.96 mM         |
| ATPase   | 8     | $V_{max}^{ATPase}$   | 1.25           | [1]    | 3.29 mM/s       |
|          | 9     | $K_m^{atp}$          | 1.5            | [1]    | 4.34 mM         |
|          | 10    | $n^{ATPase}$         | 3              | [1]    | [-]             |
| pi Trsp. | 11    | $V_{max}^{pi.Trsp.}$ | 1              | [-]    | 3.60 mmol/s     |
|          | 12    | $K_i^{pi}$           | 0.5            | [-]    | 0.56 mM         |
|          | 13    | $K_m^{adp}$          | 0.5            | [-]    | 0.19 mM         |
|          | 14    | $K_m^{atp}$          | 0.5            | [-]    | 0.52 mM         |
|          | 15    | $K_m^{pi\_ext}$      | 0.5            | [-]    | 0.75 mM         |
|          | 16    | $K_m^{pi}$           | 0.5            | [-]    | 0.30 mM         |
|          | PGI   | 17                   | $K_{eq}^{PGI}$ | 0.43   | [3]             |
| 18       |       | $V_{max}^{PGI}$      | 651            | [4]    | 21.68 mM/s      |
| 19       |       | $K_m^{f6p}$          | 0.147          | [3]    | 3.14 mM         |
| 20       |       | $K_m^{g6p}$          | 0.28           | [4]    | 0.20 mM         |
| PFK      | 21    | $V_{max}^{PFK}$      | 2.23           | [1]    | 18.36 mM/s      |
|          | 22    | $K_m^{adp}$          | 0.49           | [5]    | 10.74 mM        |
|          | 23    | $K_m^{atp}$          | 0.18           | [1]    | 0.062 mM        |
|          | 24    | $K_m^{f6p}$          | 0.25           | [1]    | 1.02 mM         |
|          | 25    | $K_m^{fbp}$          | 16.7           | [5]    | 86.80 mM        |
| FBA      | 26    | $K_{eq}^{FBA}$       | 0.056          | [1]    | [-]             |
|          | 27    | $V_{max}^{FBA}$      | 9.9            | [1]    | 56.13 mM/s      |
|          | 28    | $K_m^{fbp}$          | 0.17           | [1]    | 0.30 mM         |
|          | 29    | $K_m^{g3p}$          | 2.8            | [1]    | 10.11 mM        |
| GAPDH    | 30    | $K_{eq}^{GAPDH}$     | 0.0007         | [1]    | [-]             |
|          | 31    | $V_{max}^{GAPDH}$    | 37.58          | [1]    | 30.01 mM/s      |
|          | 32    | $K_m^{bpg}$          | 0.05           | [1]    | 0.048 mM        |
|          | 33    | $K_m^{g3p}$          | 0.25           | [1]    | 0.18 mM         |
|          | 34    | $K_m^{nadh}$         | 0.067          | [1]    | 0.64 mM         |
|          | 35    | $K_m^{nad}$          | 0.2            | [1]    | 0.048 mM        |
|          | 36    | $K_m^{pi}$           | 2.35           | [1]    | 6.75 mM         |
| ENO      | 37    | $K_{eq}^{ENO}$       | 27.55          | [1]    | [-]             |
|          | 38    | $V_{max}^{ENO}$      | 14.84          | [1]    | 29.13 mM/s      |
|          | 39    | $K_m^{adp}$          | 0.2            | [1]    | 0.41 mM         |
|          | 40    | $K_m^{atp}$          | 0.3            | [1]    | 0.75 mM         |
|          | 41    | $K_m^{bpg}$          | 0.003          | [1]    | 0.024 mM        |
|          | 42    | $K_m^{pep}$          | 0.53           | [1]    | 1.39 mM         |

|     |    |                 |        |      |               |
|-----|----|-----------------|--------|------|---------------|
| PYK | 43 | $V_{max}^{PYK}$ | 4.82   | [1]  | 2.22 mM/s     |
|     | 44 | $K_a^{fbp}$     | 0.2    | [1]  | 0.039 mM      |
|     | 45 | $K_i^{pi}$      | 0.5    | [1]  | 3.70 mM       |
|     | 46 | $K_m^{adp}$     | 1      | [1]  | 3.08 mM       |
|     | 47 | $K_m^{atp}$     | 10     | [1]  | 29.60 mM      |
|     | 48 | $K_m^{pep}$     | 0.17   | [1]  | 0.33 mM       |
|     | 49 | $K_m^{pyr}$     | 21     | [1]  | 96.42 mM      |
|     | 50 | $n^{PYK}$       | 3      | [1]  | [-]           |
| LDH | 51 | $V_{max}^{LDH}$ | 36.49  | [1]  | 566.60 mmol/s |
|     | 52 | $K_a^{fbp}$     | 0.002  | [1]  | 0.018 mM      |
|     | 53 | $K_i^{pi}$      | 0.002  | [1]  | 0.068 mM      |
|     | 54 | $K_m^{lactate}$ | 100    | [6]  | 94.12 mM      |
|     | 55 | $K_m^{nadh}$    | 0.08   | [6]  | 0.14 mM       |
|     | 56 | $K_m^{nad}$     | 2.4    | [6]  | 3.08 mM       |
|     | 57 | $K_m^{pyr}$     | 1.5    | [6]  | 0.01 mM       |
| PFL | 58 | $K_{eq}^{PFL}$  | 650    | [7]  | [-]           |
|     | 59 | $K_m^{CoA}$     | 0.02   | [8]  | 0.12 mM       |
|     | 60 | $V_{max}^{PFL}$ | 4.317  | [6]  | 0.0023 mmol/s |
|     | 61 | $K_i^{g3p}$     | 0.001  | [9]  | 0.51 mM       |
|     | 62 | $K_m^{acetCoA}$ | 0.008  | [6]  | 7.34 mM       |
|     | 63 | $K_m^{formate}$ | 24     | [6]  | 54.27 mM      |
|     | 64 | $K_m^{pyr}$     | 1      | [6]  | 5.78 mM       |
| AE  | 65 | $V_{max}^{AE}$  | 1.62   | [6]  | 2.12 mmol/s   |
|     | 66 | $K_i^{atp}$     | 0.5    | [-]  | 6.28 mM       |
|     | 67 | $K_m^{acetCoA}$ | 0.007  | [6]  | 7.38 mM       |
|     | 68 | $K_m^{CoA}$     | 0.008  | [6]  | 0.092 mM      |
|     | 69 | $K_m^{ethanol}$ | 1      | [6]  | 2.28 mM       |
|     | 70 | $K_m^{nadh}$    | 0.025  | [6]  | 0.43 mM       |
|     | 71 | $K_m^{nad}$     | 0.08   | [6]  | 1.31 mM       |
| ACK | 72 | $V_{max}^{ACK}$ | 8.93   | [6]  | 3.84 mmol/s   |
|     | 73 | $K_m^{adp}$     | 0.5    | [6]  | 1.17 mM       |
|     | 74 | $K_m^{atp}$     | 0.07   | [6]  | 14.16 mM      |
|     | 75 | $K_m^{acetCoA}$ | 0.2    | [6]  | 0.56 mM       |
|     | 76 | $K_m^{acetate}$ | 7      | [6]  | 0.55 mM       |
|     | 77 | $K_m^{CoA}$     | 0.1    | [6]  | 0.17 mM       |
| PDC | 78 | $K_{eq}^{PDC}$  | 900000 | [11] | [-]           |
|     | 79 | $V_{max}^{PDC}$ | 10     | [6]  | 0.35 mM/s     |
|     | 80 | $K_m^{acetoin}$ | 0.5    | [-]  | 0.050 mM      |
|     | 81 | $K_m^{pyr}$     | 5.2    | [10] | 0.26 mM       |

|            |     |                        |                |      |             |
|------------|-----|------------------------|----------------|------|-------------|
| BDH        | 82  | $K_{eq}^{BDH}$         | 1400           | [6]  | [-]         |
|            | 83  | $V_{max}^{BDH}$        | 1.75           | [6]  | 2.29 mmol/s |
|            | 84  | $K_m^{acetoin}$        | 0.06           | [6]  | 5.62 mM     |
|            | 85  | $K_m^{butanediol}$     | 2.6            | [6]  | 1.81 mM     |
|            | 86  | $K_m^{nadh}$           | 0.02           | [6]  | 3.55 mM     |
|            | 87  | $K_m^{nad}$            | 0.16           | [6]  | 1.30 mM     |
|            | MPD | 88                     | $K_{eq}^{MPD}$ | 200  | [12]        |
| 89         |     | $V_{max}^{MPD}$        | 1              | [2]  | 1.33 mM/s   |
| 90         |     | $K_i^{f6p}$            | 3.3            | [2]  | 22.03 mM    |
| 91         |     | $K_m^{f6p}$            | 1.66           | [2]  | 0.32 mM     |
| 92         |     | $K_m^{m1p}$            | 0.15           | [2]  | 0.089 mM    |
| 93         |     | $K_m^{nadh}$           | 0.016          | [2]  | 0.030 mM    |
| 94         |     | $K_m^{nad}$            | 0.06           | [2]  | 0.37 mM     |
| MP         | 95  | $V_{max}^{MP}$         | 1              | [-]  | 3.49 mM/s   |
|            | 96  | $K_m^{m1p}$            | 0.2            | [13] | 3.52 mM     |
|            | 97  | $K_m^{mannitol}$       | 0.5            | [-]  | 0.24 mM     |
| PTS_Mtl    | 98  | $V_{max}^{PTS_{Mtl}}$  | 1              | [-]  | 4.45 mmol/s |
|            | 99  | $K_m^{m1p}$            | 0.5            | [-]  | 0.36 mM     |
|            | 100 | $K_m^{mannitol_{Ext}}$ | 0.5            | [-]  | 0.013 mM    |
|            | 101 | $K_m^{pep}$            | 0.5            | [-]  | 2.21 mM     |
|            | 102 | $K_m^{pyr}$            | 0.5            | [-]  | 0.34 mM     |
| Ace. Trsp. | 103 | $V_{max}^{Ace.Trsp.}$  | 1              | [-]  | 1.60 mmol/s |
|            | 104 | $K_m^{acetoin}$        | 0.5            | [-]  | 1.89 mM     |
| Mtl. Trsp. | 105 | $K_m^{acetoin_{Ext}}$  | 0.5            | [-]  | 7.05 mM     |
|            | 106 | $V_{max}^{Mtl.Trsp.}$  | 1              | [-]  | 1.62 mmol/s |
|            | 107 | $K_m^{mannitol_{Ext}}$ | 0.5            | [-]  | 0.94 mM     |
|            | 108 | $K_m^{mannitol}$       | 0.5            | [-]  | 0.022 mM    |
| FBPase     | 109 | $V_{max}^{FBPase}$     | 1              | [-]  | 0.097 mM/s  |
|            | 110 | $K_m^{f6p}$            | 0.5            | [-]  | 1.91 mM     |
|            | 111 | $K_m^{fbp}$            | 0.5            | [-]  | 0.41 mM     |
|            | 112 | $K_m^{pi}$             | 0.5            | [-]  | 0.011 mM    |

Parameters with missing reference or not estimated represented by “[-]”. Here the initial  $V_{max}$  values units are given in mM/s and the initial  $K_m$  values in mM. All the abbreviations for the enzymes are explained in nomenclature.

#### Reference List

1. Levering J, Musters MWJM, Bekker M, Bellomo D, Fiedler T, de Vos WM *et al.*: **Role of phoshate in the central metabolism of two lactic acid bacteria - a comparative systems biology approach.** *FEBS J* 2012, **279**: 1274-1290.

2. Brown AT, Bowles RD: **Polyol Metabolism by A Caries-Conducive Streptococcus - Purification and Properties of A Nicotinamide Adenine Dinucleotide-Dependent Mannitol-1-Phosphate Dehydrogenase.** *Infection and Immunity* 1977, **16**: 163-173.
3. Pettersson G: **What Metabolite Levels May be Evolutionarily Reached in the Glycolytic Pathway.** *European Journal of Biochemistry* 1990, **194**: 141-146.
4. Gao H, Chen Y, Leary JA: **Kinetic measurements of phosphoglucose isomerase and phosphomannose isomerase by direct analysis of phosphorylated aldose-ketose isomers using tandem mass spectrometry.** *International Journal of Mass Spectrometry* 2005, **240**: 291-299.
5. Hansen T, Schonheit P: **Purification and properties of the first-identified, archaeal, ATP-dependent 6-phosphofructokinase, an extremely thermophilic non-allosteric enzyme, from the hyperthermophile *Desulfurococcus amylolyticus*.** *Archives of Microbiology* 2000, **173**: 103-109.
6. Hoefnagel MHN, Starrenburg MJC, Martens DE, Hugenholtz J, Kleerebezem M, Van Swam II *et al.*: **Metabolic engineering of lactic acid bacteria, the combined approach: kinetic modelling, metabolic control and experimental analysis.** *Microbiology* 2002, **148**: 1003-1013.
7. Andersen AZ, Carvalho AL, Neves AR, Santos H, Kummer U, Olsen LF: **The metabolic pH response in *Lactococcus lactis*: An integrative experimental and modelling approach.** *Computational Biology and Chemistry* 2009, **33**: 71-83.
8. Takahashi S, Abbe K, Yamada T: **Purification of Pyruvate Formate-Lyase from *Streptococcus-Mutans* and Its Regulatory Properties.** *Journal of Bacteriology* 1982, **149**: 1034-1040.
9. Asanuma N, Hino T: **Effects of pH and energy supply on activity and amount of pyruvate formate-lyase in *Streptococcus bovis*.** *Applied and Environmental Microbiology* 2000, **66**: 3773-3777.
10. Tittmann K, Vyazmensky M, Hubner G, Barak Z, Chipman DM: **The carboligation reaction of acetohydroxyacid synthase II: Steady-state intermediate distributions in wild type and mutants by NMR.** *Proceedings of the National Academy of Sciences of the United States of America* 2005, **102**: 553-558.
11. Hoefnagel MHN, van der Burgt A, Martens DE, Hugenholtz J, Snoep JL: **Time dependent responses of glycolytic intermediates in a detailed glycolytic model of *Lactococcus lactis* during glucose run-out experiments.** *Molecular Biology Reports* 2002, **29**: 157-161.
12. Wolff JB, Kaplan NO: **D-Mannitol 1-Phosphate Dehydrogenase from *Escherichia-Coli*.** *Journal of Biological Chemistry* 1956, **218**: 849-869.
13. Schomburg I, Chang A, Schomburg D: **BRENDA, enzyme data and metabolic information.** *Nucleic Acids Research* 2002, **30**: 47-49.

**Table 3.** Initial conditions of state variables (metabolites concentrations) for 40mM glucose pulse in the kinetic model.

| Metabolite     | Initial concentration (mM) | Source       |
|----------------|----------------------------|--------------|
| glc_Ext        | 40                         | experimental |
| g6p            | 0                          | assumed      |
| f6p            | 0                          | assumed      |
| fbp            | 15.3                       | experimental |
| g3p            | 0                          | experimental |
| bpg            | 1.26                       | estimated    |
| pep            | 2.48                       | estimated    |
| pyr            | 0                          | experimental |
| lactate        | 0                          | experimental |
| acetoin        | 0                          | experimental |
| acetoin_Ext    | 0                          | experimental |
| 2,3-butanediol | 0                          | experimental |
| acetCoA        | 0                          | experimental |
| CoA            | 1                          | [1]          |
| ethanol        | 0                          | experimental |
| formate        | 0                          | experimental |
| acetate        | 0                          | experimental |
| m1p            | 0                          | experimental |
| mannitol       | 0                          | experimental |
| mannitol_Ext   | 0                          | experimental |
| atp            | 4.89                       | estimated    |
| adp            | 20.39                      | estimated    |
| nad            | 4.67                       | experimental |
| nadh           | $2.03 \cdot 10^{-6}$       | estimated    |
| pi             | 38.26                      | experimental |
| pi_Ext         | 50                         | experimental |

All the abbreviations for the metabolites are explained in nomenclature.

#### Reference List

1. Hoefnagel MHN, van der Burgt A, Martens DE, Hugenholtz J, Snoep JL: **Time dependent responses of glycolytic intermediates in a detailed glycolytic model of *Lactococcus lactis* during glucose run-out experiments.** *Molecular Biology Reports* 2002, **29**: 157-161.

**Table 4.** Kinetic rate expressions used in the model.

**Phosphotransferase System (PTS\_Glc):**

$$r_{PTS_{Glc}} = \left( \frac{[pi]}{K_a^{pi} + [pi]} \right) \left( \frac{K_i^{fbp}}{K_i^{fbp} + [fbp]} \right) \frac{V_{max}^{PTS\_Glc} \left( \frac{[glc\_Ext]}{K_m^{glc\_Ext}} \right) \left( \frac{[pep]}{K_m^{pep}} \right)}{\left( 1 + \frac{[glc\_Ext]}{K_m^{glc\_Ext}} \right) \left( 1 + \frac{[pep]}{K_m^{pep}} \right) + \left( 1 + \frac{[g6p]}{K_m^{g6p}} \right) \left( 1 + \frac{[pyr]}{K_m^{pyr}} \right) - 1}$$

**Phosphoglucose isomerase (PGI):**

$$r_{PGI} = \frac{V_{max}^{PGI} \frac{[g6p]}{K_m^{g6p}} - \frac{V_{max}^{PGI} [f6p]}{K_{eq}^{PGI} K_m^{g6p}}}{1 + \frac{[g6p]}{K_m^{g6p}} + \frac{[f6p]}{K_m^{f6p}}}$$

**Phosphofructokinase (PFK):**

$$r_{PFK} = \frac{V_{max}^{PFK} \left( \frac{[f6p]}{K_m^{f6p}} \right) \left( \frac{[atp]}{K_m^{atp}} \right)}{\left( 1 + \frac{[f6p]}{K_m^{f6p}} \right) \left( 1 + \frac{[atp]}{K_m^{atp}} \right) + \left( 1 + \frac{[fbp]}{K_m^{fbp}} \right) \left( 1 + \frac{[adp]}{K_m^{adp}} \right) - 1}$$

**Fructose-1,6-bisphosphate phosphatase (FBPase):**

$$r_{FBPase} = \frac{V_{max}^{FBPase} \left( \frac{[fbp]}{K_m^{fbp}} \right)}{\left( 1 + \frac{[fbp]}{K_m^{fbp}} \right) + \left( 1 + \frac{[f6p]}{K_m^{f6p}} \right) \left( 1 + \frac{[pi]}{K_m^{pi}} \right) - 1}$$

**Fructose-1,6-bisphosphate aldolase (FBA):**

$$r_{FBA} = \frac{V_{max}^{FBA} \frac{[fbp]}{K_m^{fbp}} - \frac{V_{max}^{FBA} [g3p]^2}{K_{eq}^{FBA} K_m^{fbp}}}{1 + \frac{[fbp]}{K_m^{fbp}} + \frac{[g3p]}{K_m^{g3p}} + \left( \frac{[g3p]}{K_m^{g3p}} \right)^2}$$

**Glyceraldehyde-3-phosphate dehydrogenase (GAPDH):**

$$r_{GAPDH} = \frac{V_{max}^{GAPDH} \frac{[g3p]}{K_m^{g3p}} \frac{[nad]}{K_m^{nad}} \frac{[pi]}{K_m^{pi}} - \frac{V_{max}^{GAPDH} [bpg] [nadh]}{K_{eq}^{GAPDH} K_m^{g3p} K_m^{nad}} \frac{1}{K_m^{pi}}}{\left( 1 + \frac{[g3p]}{K_m^{g3p}} \right) \left( 1 + \frac{[pi]}{K_m^{pi}} \right) \left( 1 + \frac{[nad]}{K_m^{nad}} \right) + \left( 1 + \frac{[bpg]}{K_m^{bpg}} \right) \left( 1 + \frac{[nadh]}{K_m^{nadh}} \right) - 1}$$

**Enolase (ENO):**

$$r_{ENO} = \frac{V_{max}^{ENO} \frac{[bpg]}{K_m^{bpg}} \frac{[adp]}{K_m^{nad}} - \frac{V_{max}^{ENO} [pep] [atp]}{K_{eq}^{ENO} K_m^{bpg} K_m^{adp}}}{\left( 1 + \frac{[bpg]}{K_m^{bpg}} \right) \left( 1 + \frac{[adp]}{K_m^{adp}} \right) + \left( 1 + \frac{[pep]}{K_m^{pep}} \right) \left( 1 + \frac{[atp]}{K_m^{atp}} \right) - 1}$$

**Pyruvate kinase (PYK):**

$$r_{PYK} = \left( \frac{[fbp]}{K_a^{fbp} + [fbp]} \right) \left( \frac{(K_i^{pi})^{n_{PYK}}}{(K_i^{pi})^{n_{PYK}} + ([pi])^{n_{PYK}}} \right) \frac{V_{max}^{PYK} \left( \frac{[adp]}{K_m^{adp}} \right) \left( \frac{[pep]}{K_m^{pep}} \right)}{\left( 1 + \frac{[adp]}{K_m^{adp}} \right) \left( 1 + \frac{[pep]}{K_m^{pep}} \right) + \left( 1 + \frac{[atp]}{K_m^{atp}} \right) \left( 1 + \frac{[pyr]}{K_m^{pyr}} \right) - 1}$$

**L-lactate dehydrogenase (LDH):**

$$r_{LDH} = \left( \frac{[fbp]}{K_a^{fbp} + [fbp]} \right) \left( \frac{K_i^{pi}}{K_i^{pi} + [pi]} \right) \frac{V_{max}^{LDH} \left( \frac{[pyr]}{K_m^{pyr}} \right) \left( \frac{[nadh]}{K_m^{nadh}} \right)}{\left( 1 + \frac{[pyr]}{K_m^{pyr}} \right) \left( 1 + \frac{[nadh]}{K_m^{nadh}} \right) + \left( 1 + \frac{[lactate]}{K_m^{lactate}} \right) \left( 1 + \frac{[nad]}{K_m^{nad}} \right)}$$

**Pyruvate dehydrogenase (PFL):**

$$r_{PFL} = \left( \frac{K_i^{g3p}}{K_i^{g3p} + [g3p]} \right) \frac{V_{max}^{PFL} \frac{[pyr]}{K_m^{pyr}} \frac{[CoA]}{K_m^{CoA}} - \frac{V_{eq}^{PFL}}{K_m^{pyr}} \frac{[acetCoA]}{K_m^{acetCoA}} \frac{[formate]}{K_m^{CoA}}}{\left( 1 + \frac{[pyr]}{K_m^{pyr}} \right) \left( 1 + \frac{[CoA]}{K_m^{CoA}} \right) + \left( 1 + \frac{[acetCoA]}{K_m^{acetCoA}} \right) \left( 1 + \frac{[formate]}{K_m^{formate}} \right) - 1}$$

**Alcohol dehydrogenase (AE):**

$$r_{AE} = \left( \frac{K_i^{atp}}{K_i^{atp} + [atp]} \right) \frac{V_{max}^{AE} \left( \frac{[acetCoA]}{K_m^{acetCoA}} \right) \left( \frac{[nadh]}{K_m^{nadh}} \right)^2}{\left( 1 + \frac{[acetCoA]}{K_m^{acetCoA}} \right) \left( 1 + \frac{[nadh]}{K_m^{nadh}} + \left( \frac{[nadh]}{K_m^{nadh}} \right)^2 \right) + \left( 1 + \frac{[ethanol]}{K_m^{ethanol}} \right) \left( 1 + \frac{[CoA]}{K_m^{CoA}} \right) \left( 1 + \frac{[nad]}{K_m^{nad}} + \left( \frac{[nad]}{K_m^{nad}} \right)^2 \right) - 1}$$

**Acetate kinase (ACK):**

$$r_{ACK} = \frac{V_{max}^{ACK} \left( \frac{[acetCoA]}{K_m^{acetCoA}} \right) \left( \frac{[adp]}{K_m^{adp}} \right)}{\left( 1 + \frac{[acetCoA]}{K_m^{acetCoA}} \right) \left( 1 + \frac{[adp]}{K_m^{adp}} \right) + \left( 1 + \frac{[acetate]}{K_m^{acetate}} \right) \left( 1 + \frac{[atp]}{K_m^{atp}} \right) \left( 1 + \frac{[CoA]}{K_m^{CoA}} \right) - 1}$$

**Pyruvate decarboxylase (PDC):**

$$r_{PDC} = \frac{V_{max}^{PD} \left( \frac{[pyr]}{K_m^{pyr}} \right)^2 - \frac{V_{max}^{PD}}{K_m^{pyr}} \frac{[acetoin]}{K_m^{acetoin}}}{\left( 1 + \frac{[pyr]}{K_m^{pyr}} + \left( \frac{[pyr]}{K_m^{pyr}} \right)^2 \right) + \left( 1 + \frac{[acetoin]}{K_m^{acetoin}} \right) - 1}$$



**2,3-Butanediol dehydrogenase (BDH):**

$$r_{BDH} = \frac{V_{max}^{BD} \left( \frac{[acetoin]}{K_m^{acetoin}} \right) \left( \frac{[nadh]}{K_m^{nadh}} \right) - \frac{V_{max}^{BD}}{K_{eq}^{BD}} \frac{[2,3 - butanediol]}{K_m^{acetoin}} \frac{[nad]}{K_m^{nadh}}}{\left( 1 + \frac{[acetoin]}{K_m^{acetoin}} \right) \left( 1 + \frac{[nadh]}{K_m^{nadh}} \right) + \left( 1 + \frac{[2,3 - butanediol]}{K_m^{butanediol}} \right) \left( 1 + \frac{[nad]}{K_m^{nad}} \right) - 1}$$

**Acetoin transport (Ace. Trsp.):**

$$r_{Ace.Trsp.} = \frac{V_{max}^{Ace.Trsp.} \left( \frac{[acetoin]}{K_m^{acetoin}} \right)}{\left( 1 + \frac{[acetoin]}{K_m^{acetoin}} \right) + \left( 1 + \frac{[acetoin\_Ext]}{K_m^{acetoin\_Ext}} \right) - 1}$$

**Mannitol-1-Phosphate dehydrogenase (MPD):**

$$r_{MPD} = \left( \frac{K_i^{f6p}}{K_i^{f6p} + [f6p]} \right) \frac{V_{max}^{MPD} \frac{[f6p]}{K_m^{f6p}} \frac{[nadh]}{K_m^{nadh}} - \frac{V_{max}^{MPD}}{K_{eq}^{MPD}} \frac{[m1p]}{K_m^{f6p}} \frac{[nad]}{K_m^{nadh}}}{\left( 1 + \frac{[f6p]}{K_m^{f6p}} \right) \left( 1 + \frac{[nadh]}{K_m^{nadh}} \right) + \left( 1 + \frac{[m1p]}{K_m^{m1p}} \right) \left( 1 + \frac{[nad]}{K_m^{nad}} \right) - 1}$$

**Mannitol-1-Phosphatase (MP):**

$$r_{MP} = \frac{V_{max}^{MP} \left( \frac{[m1p]}{K_m^{m1p}} \right)}{\left( 1 + \frac{[m1p]}{K_m^{m1p}} \right) + \left( 1 + \frac{[mannitol]}{K_m^{mannitol}} \right) - 1}$$

**Phosphotransferase System (PTS\_Mtl):**

$$r_{PTS\_Mtl} = \frac{V_{max}^{PTS\_Mtl} \left( \frac{[mannitol\_Ext]}{K_m^{mannitol\_Ext}} \right) \left( \frac{[pep]}{K_m^{pep}} \right)}{\left( 1 + \frac{[mannitol\_Ext]}{K_m^{mannitol\_Ext}} \right) \left( 1 + \frac{[pep]}{K_m^{pep}} \right) + \left( 1 + \frac{[m1p]}{K_m^{m1p}} \right) \left( 1 + \frac{[pyr]}{K_m^{pyr}} \right) - 1}$$

**Mannitol transport (Mtl. Trsp.):**

$$r_{Mtl.Trsp.} = \frac{V_{max}^{Mtl.Trsp.} \left( \frac{[mannitol]}{K_m^{mannitol}} \right)}{\left( 1 + \frac{[mannitol]}{K_m^{mannitol}} \right) + \left( 1 + \frac{[mannitol\_Ext]}{K_m^{mannitol\_Ext}} \right) - 1}$$

**Phosphate transport (pi Trsp.):**

$$r_{pi\ Trsp.} = \left( \frac{K_i^{pi}}{K_i^{pi} + [pi]} \right) \frac{V_{max}^{pi\ Trsp.} \left( \frac{[atp]}{K_m^{atp}} \right) \left( \frac{[pi\_Ext]}{K_m^{pi\_Ext}} \right)}{\left( 1 + \frac{[atp]}{K_m^{atp}} \right) \left( 1 + \frac{[pi\_Ext]}{K_m^{pi\_Ext}} \right) + \left( 1 + \frac{[adp]}{K_m^{adp}} \right) \left( 1 + \frac{[pi]}{K_m^{pi}} + \left( \frac{[pi]}{K_m^{pi}} \right)^2 \right) - 1}$$

**ATP phosphatase (ATPase):**

$$r_{ATPase} = V_{max}^{ATPase} \left( \frac{\left( \frac{[atp]}{K_m^{atp}} \right)^{n^{ATPase}}}{\left( \frac{[atp]}{K_m^{atp}} \right)^{n^{ATPase}} + 1} \right)$$

---

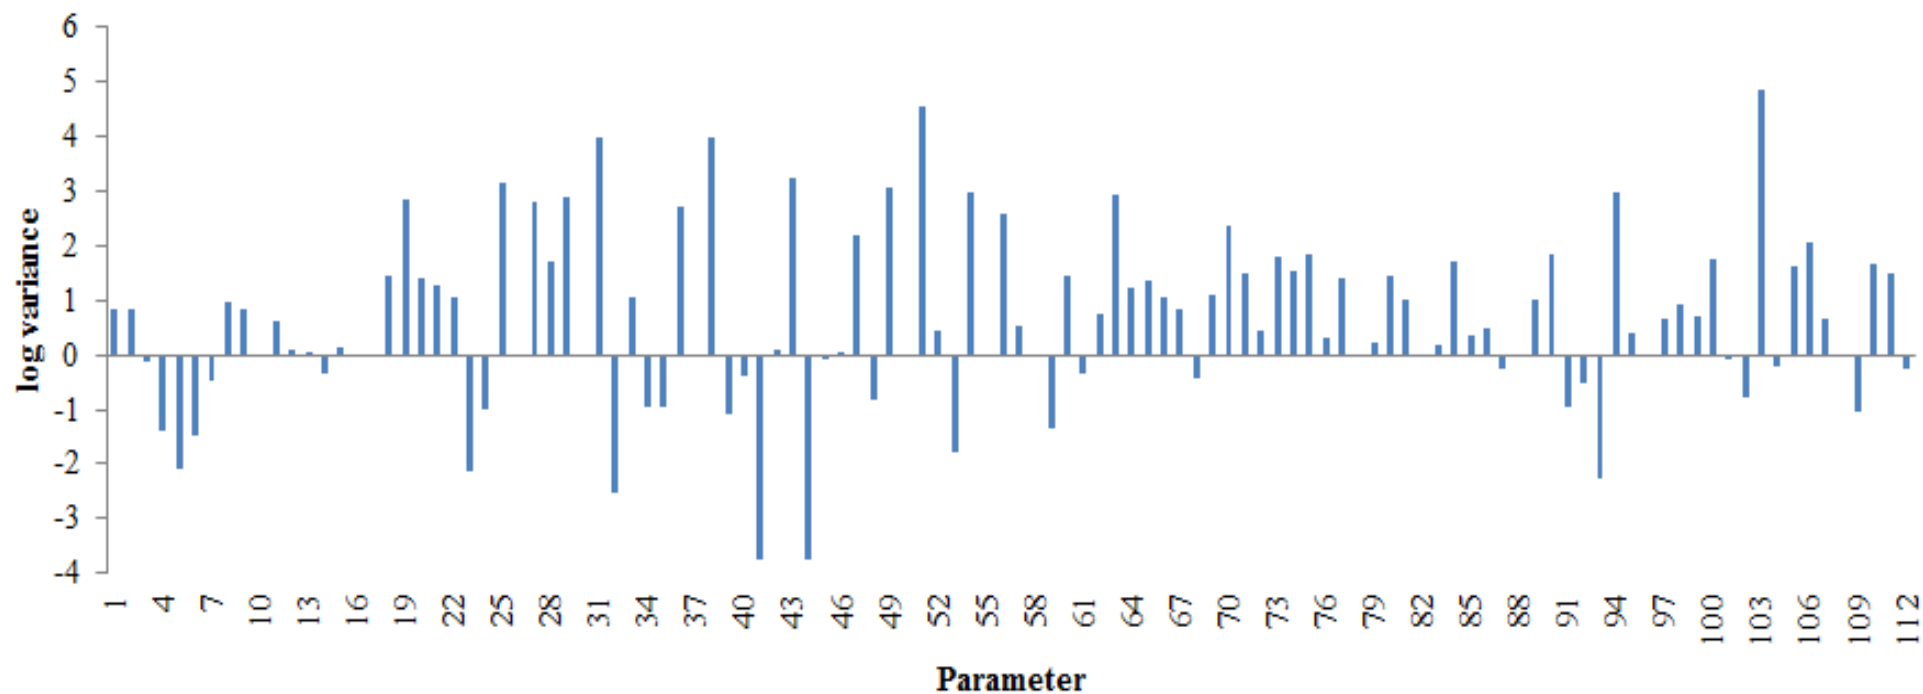

**Figure 1.** Variance analysis of the parameter set values of the kinetic model. For a better visualization the variance of every parameter are plotted with a logarithmic scale. The parameter indices correspond to the reaction numbers shown in Additional File 2.

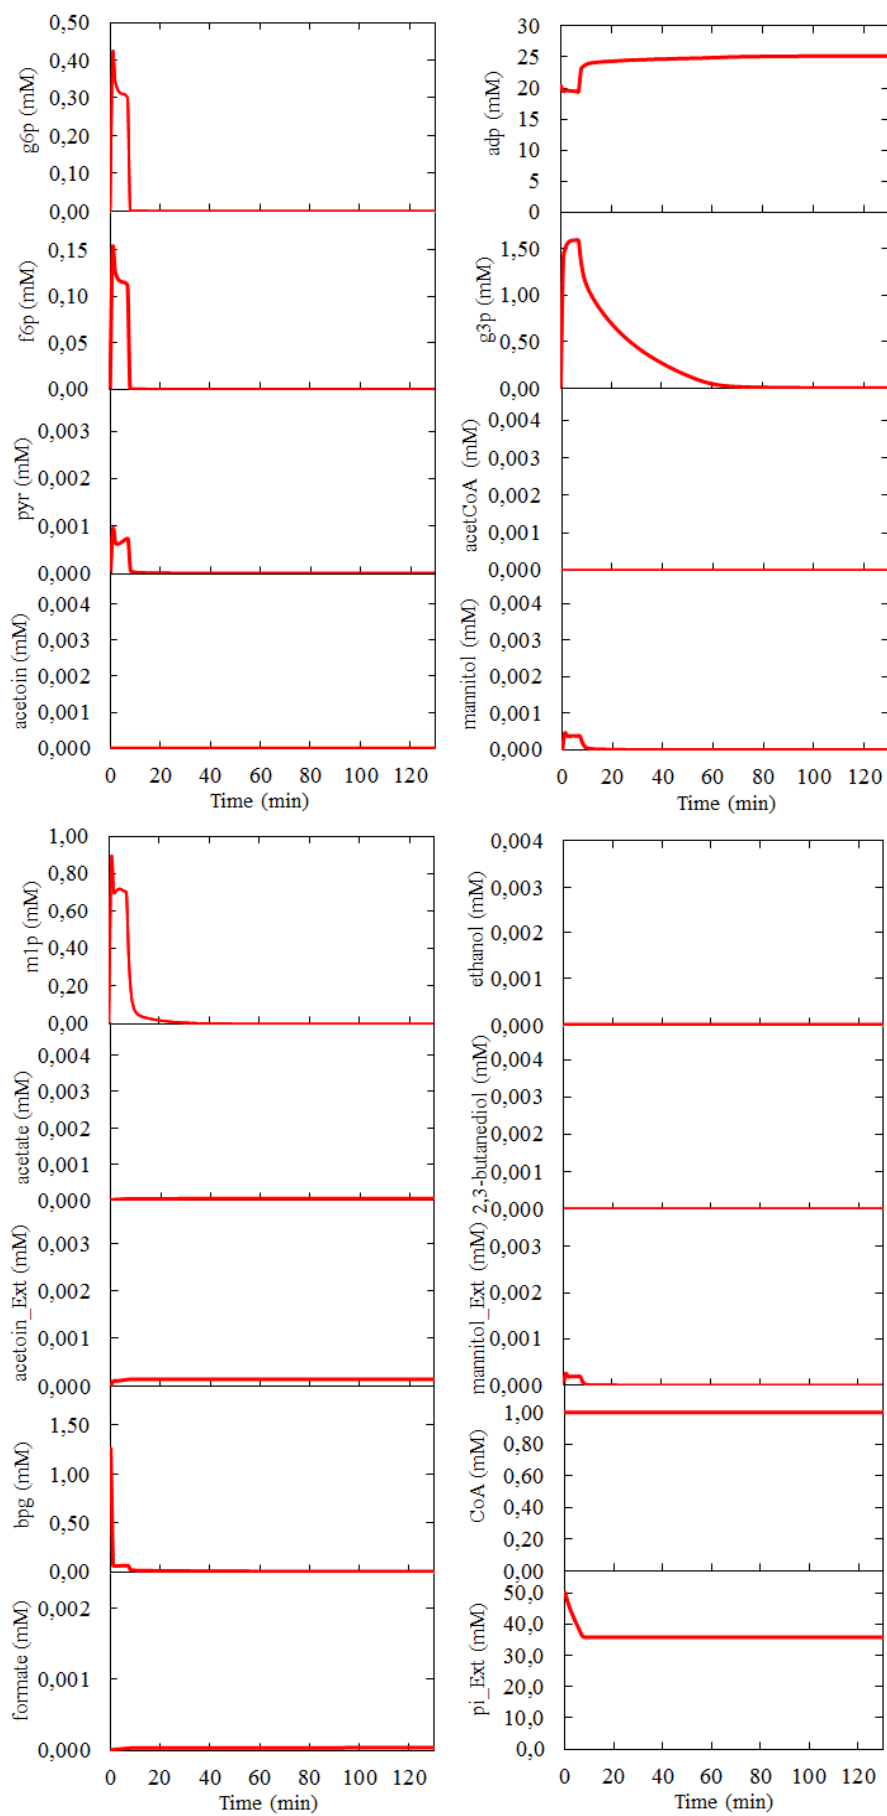

**Figure 2.** Simulation results for the initial metabolite concentrations and estimated kinetic parameter values listed in Additional File 3 and 2, respectively.

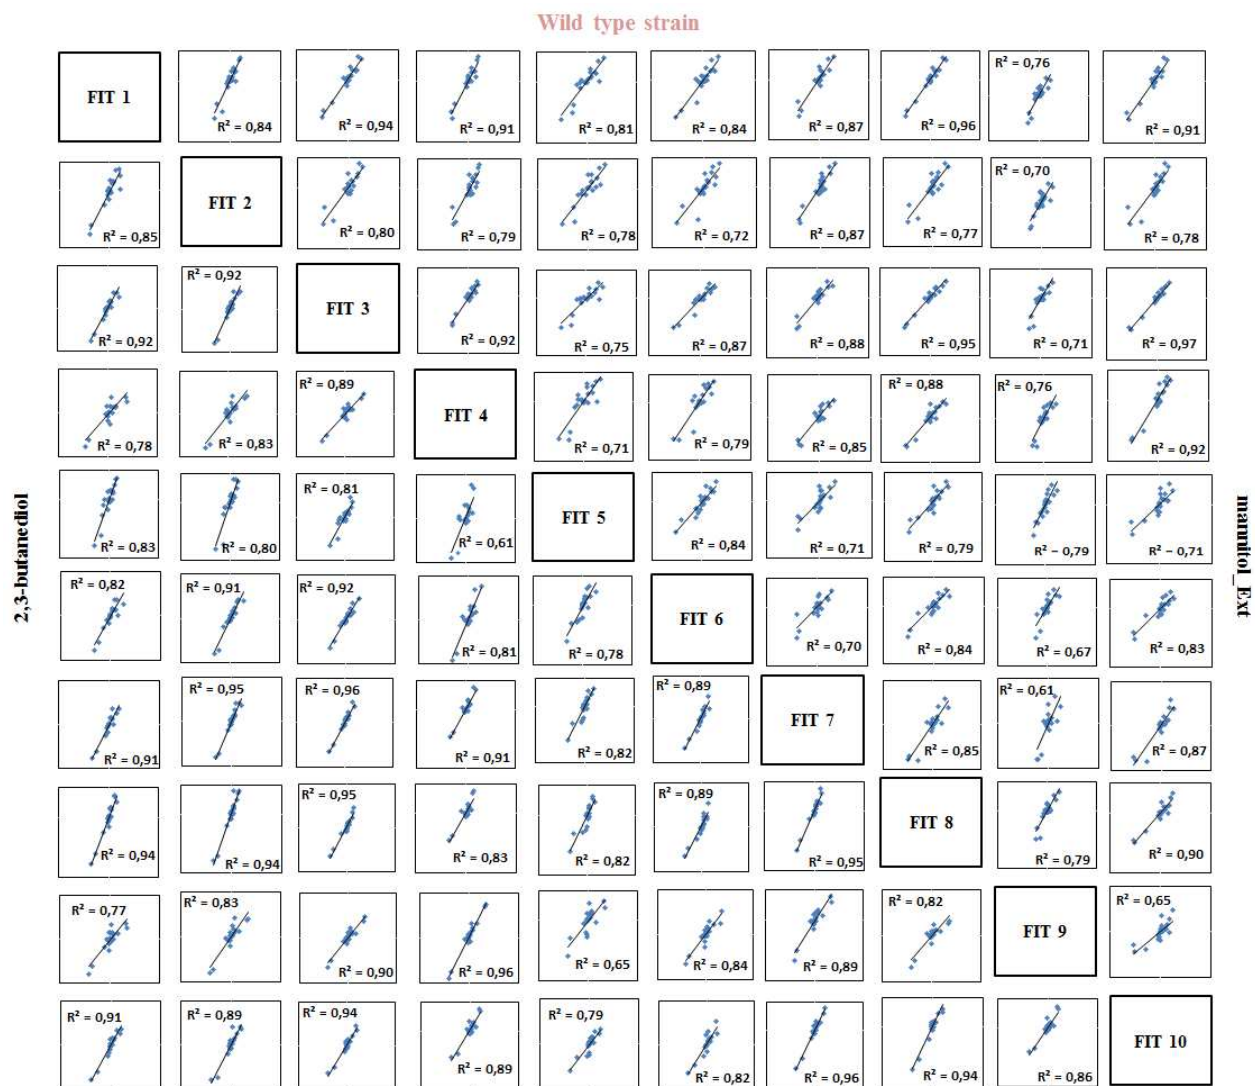

**Figure 3.** Correlation values of sensitivities between all pairs of fits from wilt-type strain for 2,3-butanediol (plots in lower triangle) and mannitol (plots in upper triangle).

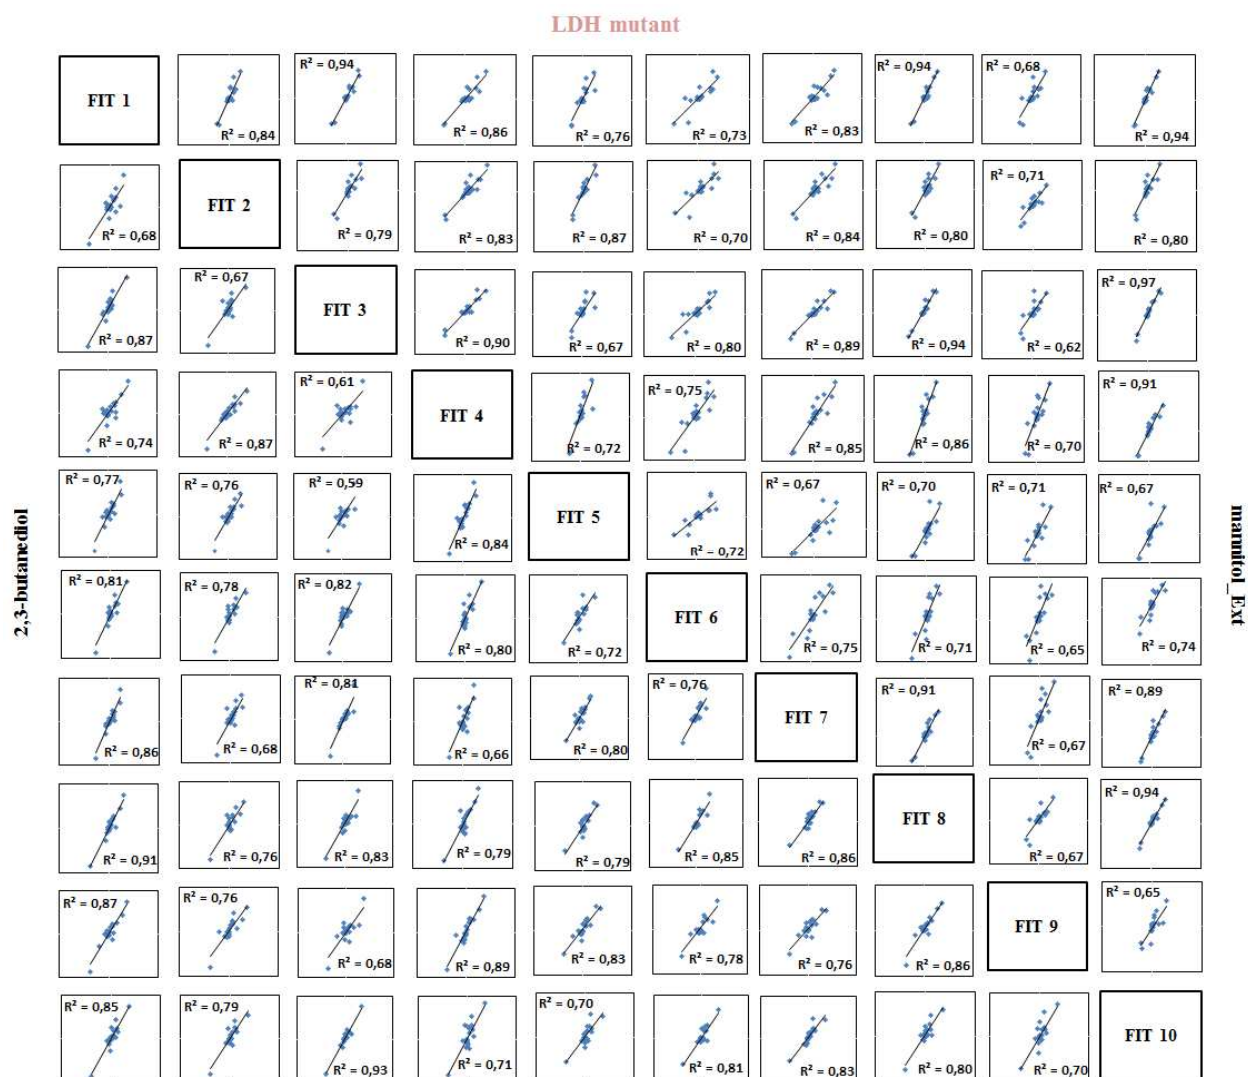

**Figure 4.** Correlation values of sensitivities between all pairs of fits from LDH mutant strain for 2,3-butanediol (plots in lower triangle) and mannitol (plots in upper triangle).

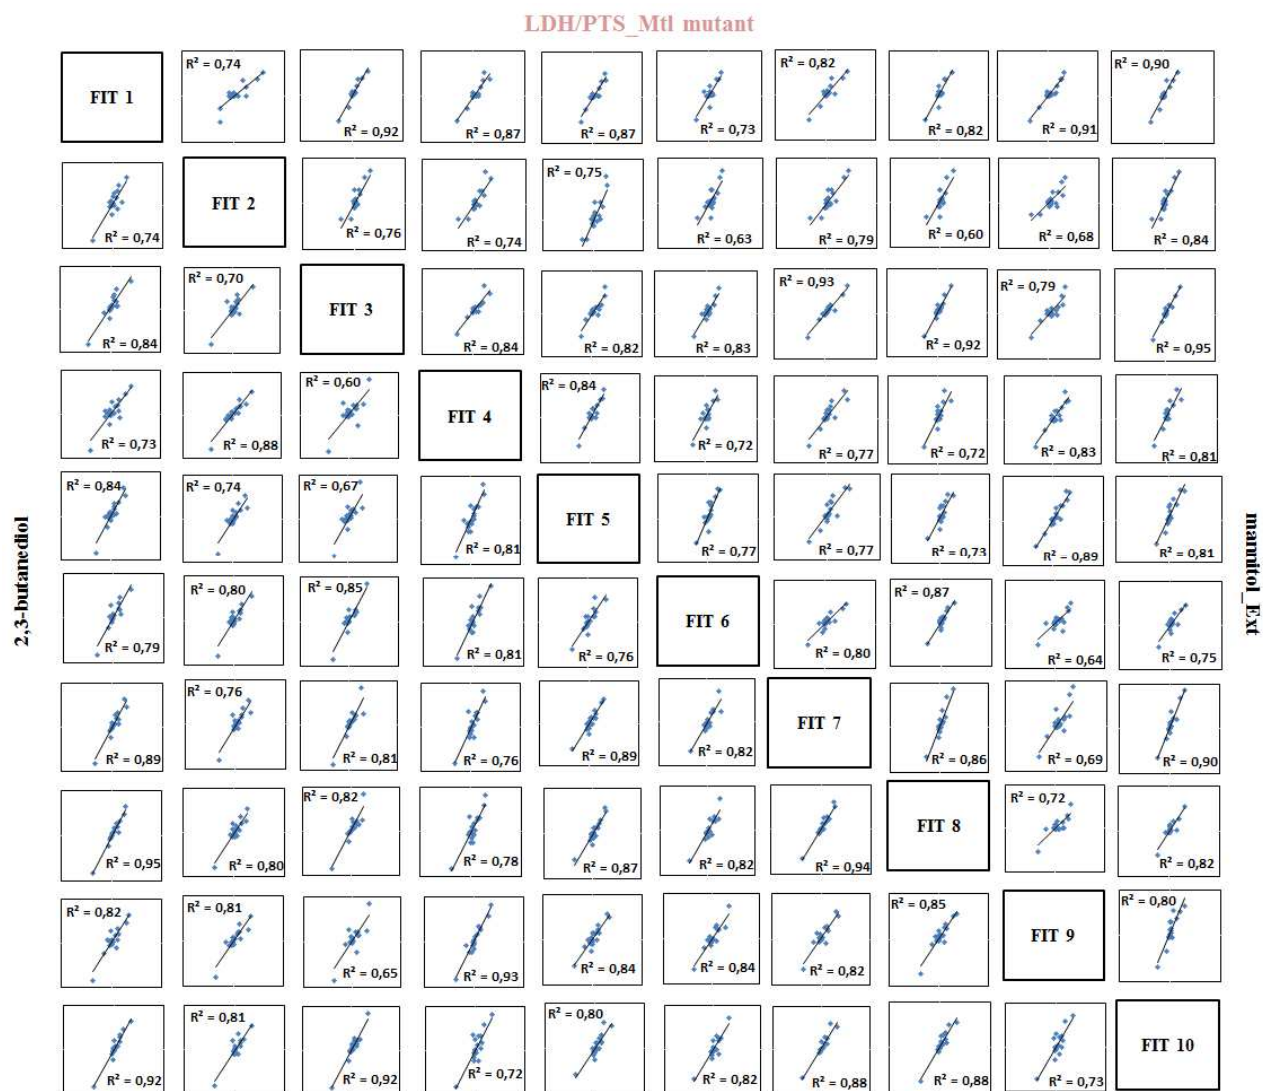

**Figure 5.** Correlation values of sensitivities between all pairs of fits from LDH/PTS<sup>Mtl</sup> mutant strain for 2,3-butanediol (plots in lower triangle) and mannitol (plots in upper triangle).

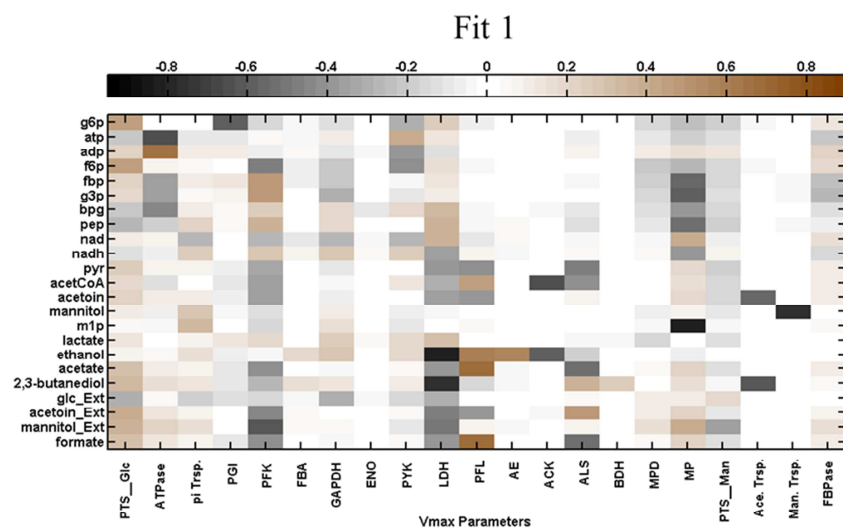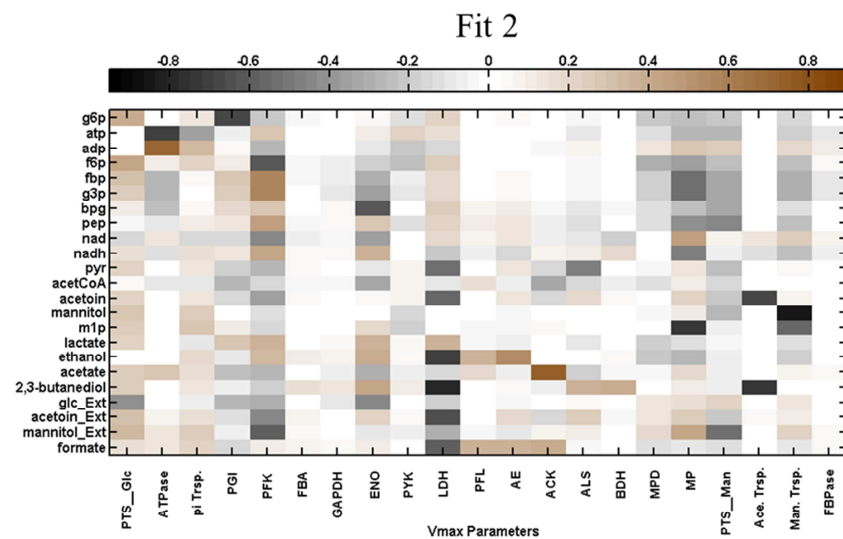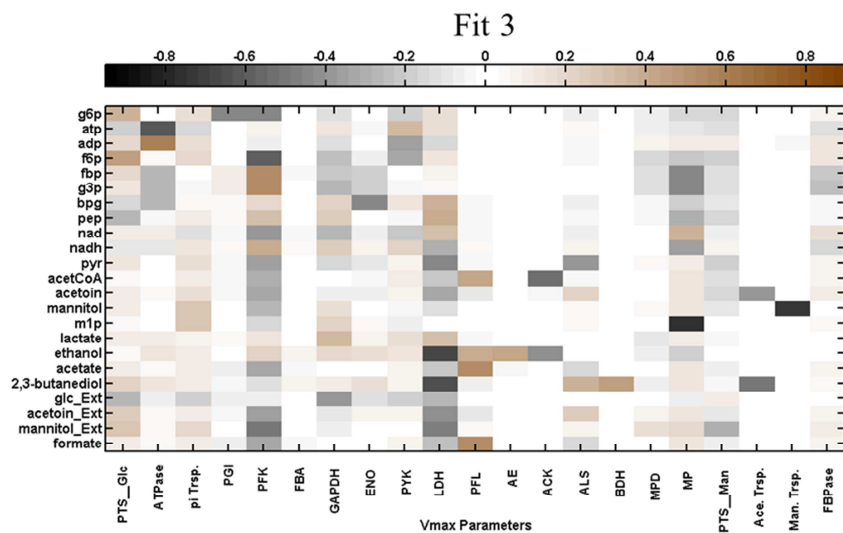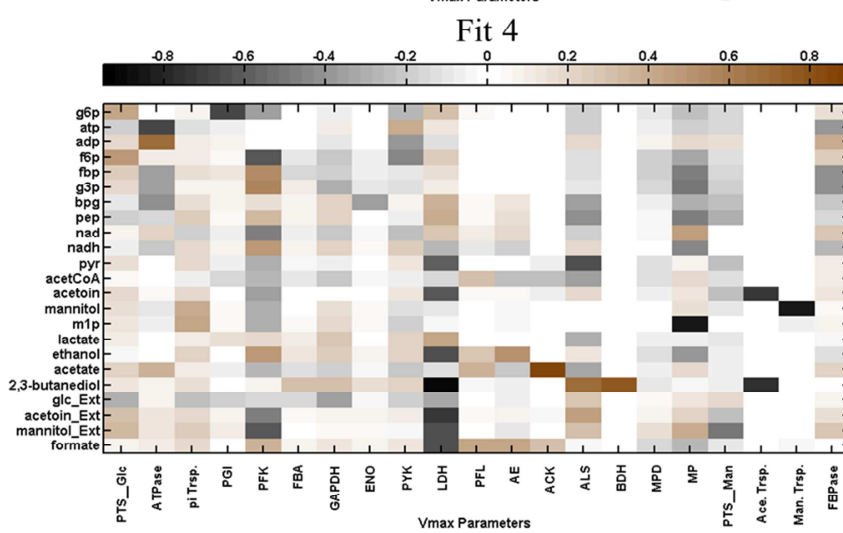



Fit 5

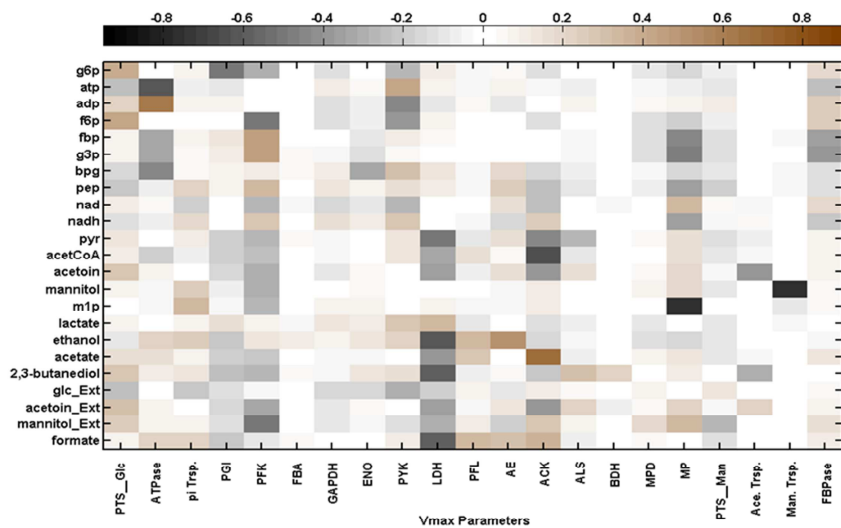

Fit 6

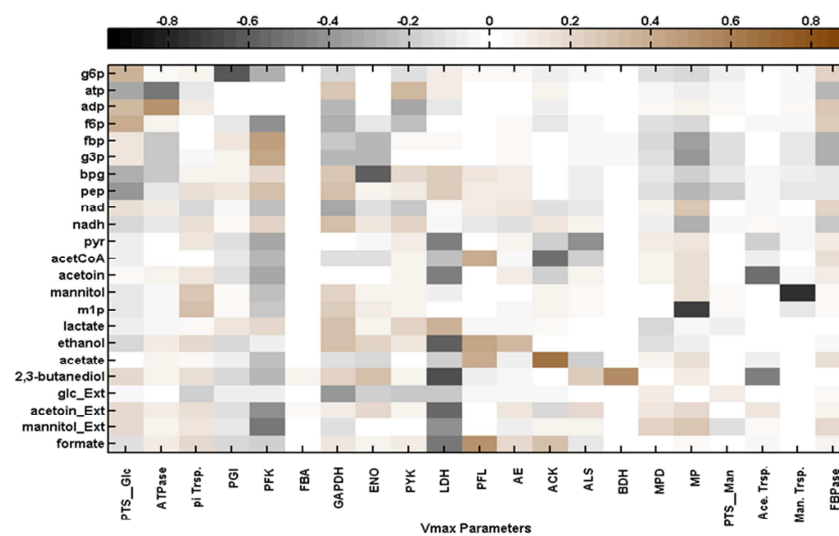

Fit 7

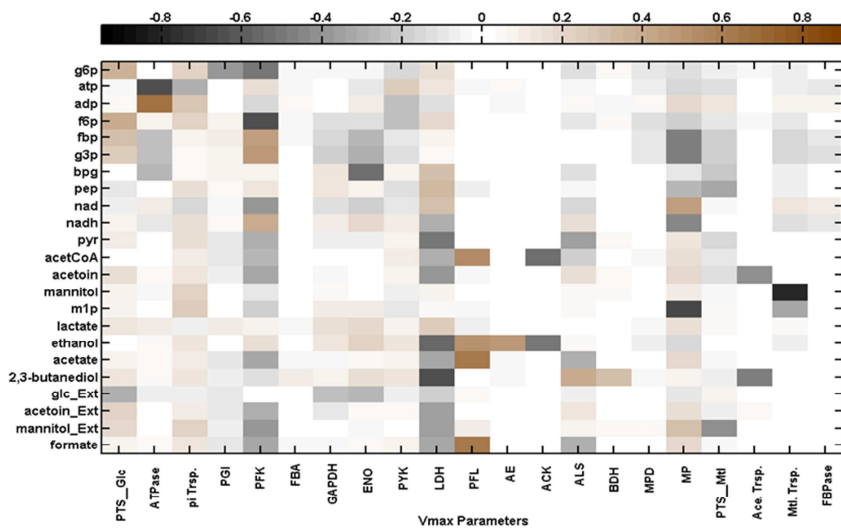

Fit 8

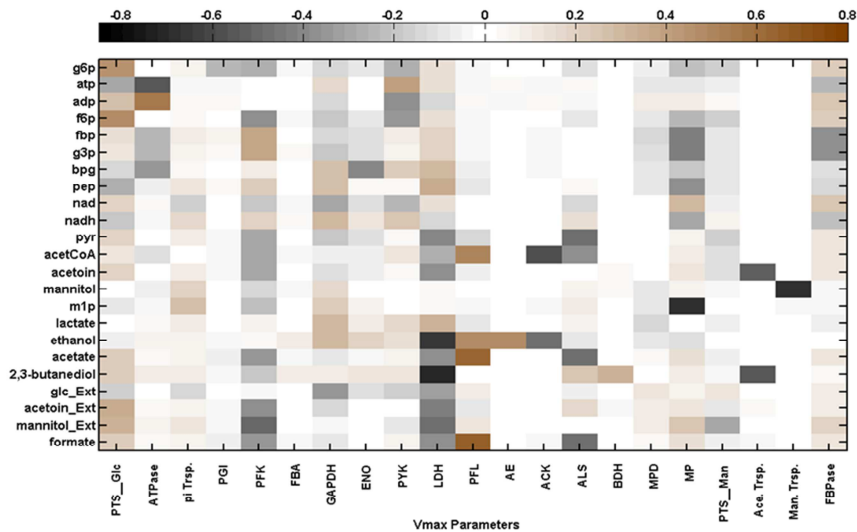

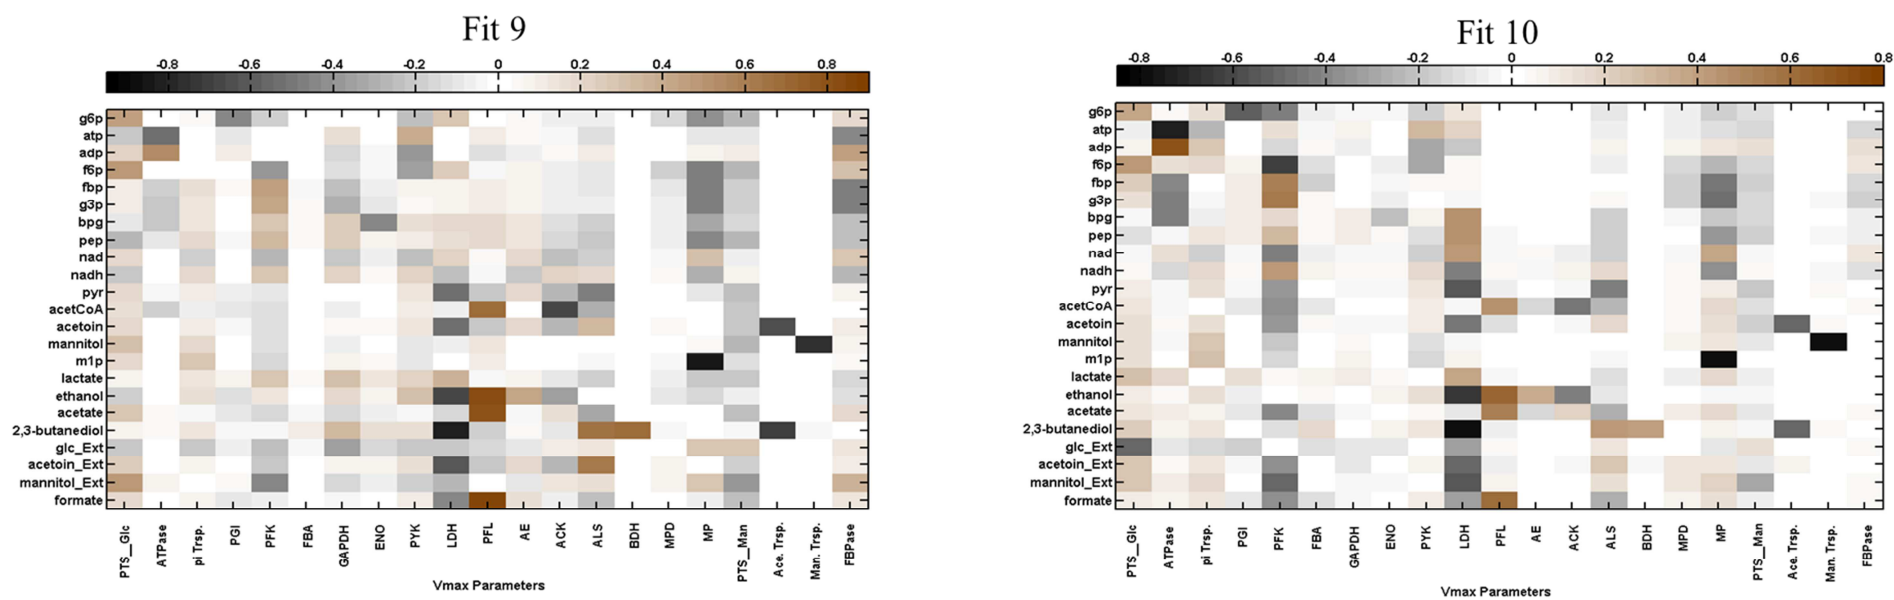

**Figure 6.** Heat maps showing the integrated response coefficients to variation in  $V_{max}$  parameters for all ten fits.
